# The 11482G>A Polymorphism in the Perilipin Gene Is Associated With Weight Gain With Rosiglitazone Treatment in Type 2 Diabetes

EUN SEOK KANG, MD, PHD<sup>1,2</sup>  
BONG SOO CHA, MD, PHD<sup>1,2</sup>  
HYEONG JIN KIM, MD<sup>3</sup>  
HAE JIN KIM, MD<sup>4</sup>  
SO HUN KIM, MD<sup>1</sup>

KYU YEON HUR, MD<sup>1</sup>  
HYUN JOO LEE, MD<sup>1</sup>  
WAN SUB SHIM, MD<sup>1</sup>  
CHUL WOO AHN, MD, PHD<sup>1,2</sup>  
HYUN CHUL LEE, MD, PHD<sup>1,2</sup>

**OBJECTIVE** — The aim of this study was to examine the effects of perilipin gene (*PLIN*) polymorphisms on weight gain with rosiglitazone treatment in patients with type 2 diabetes.

**RESEARCH DESIGN AND METHODS** — A total of 160 type 2 diabetic patients were treated with rosiglitazone (4 mg/day) for 12 weeks in addition to their previous medications, which were unchanged. Four single nucleotide polymorphisms (SNPs) at the *PLIN* locus were genotyped: *PLIN* 6209T>C, *PLIN* 11482G>A, *PLIN* 13041A>G, and *PLIN* 14995A>T.

**RESULTS** — Although fasting plasma glucose and HbA<sub>1c</sub> levels decreased; mean body weight increased significantly after rosiglitazone treatment. Among the four SNPs tested, only the *PLIN* 11482G>A polymorphism was associated with weight gain from rosiglitazone treatment. In addition, there was a significant difference in the increase in the body weight among the genotypes. Patients with the 11482A/A genotype showed less increase in body weight than those with other genotypes.

**CONCLUSIONS** — These data suggest that genetic variations in the perilipin gene can affect weight gain associated with rosiglitazone treatment in patients with type 2 diabetes.

*Diabetes Care* 29:1320–1324, 2006

**T**hiazolidinediones (TZDs) work by enhancing insulin sensitivity in the muscle and adipose tissue. TZDs lower blood glucose and insulin levels and may improve pancreas  $\beta$ -cell function (1). TZDs activate nuclear peroxisome proliferator-activated receptor (PPAR)- $\gamma$ , which is expressed predominantly in adipose tissue and regulates the transcription of genes involved in adipocyte differentiation, as well as those in-

involved in glucose and lipid metabolism (2,3). Despite normalizing glycemia and hyperinsulinemia, TZDs promote body weight gain in vivo (4–8) and adipogenesis in vitro (9–11). A dose-dependent weight gain of between 2 and 5 kg has been observed with pioglitazone and rosiglitazone (12,13). This is one of the main side effects of TZD treatment. The weight gain associated with the use of TZDs is

likely to be due to an increase in adipose tissue (6,14).

Perilipins are phosphoproteins that coat intracellular lipid droplets (15–17). Recent studies have shown that these proteins are essential for the regulation of triglyceride deposition and mobilization (18–24). The perilipin gene (*PLIN*) is located at 15q26.1 (25), in the neighborhood of susceptibility loci for obesity, diabetes, and hypertriglyceridemia (26,27). The *PLIN* gene encodes four different products (Perilipin A, B, C, and D) due to differential splicing (28). Perilipin A is the most common isoform in human adipose tissue (17,23,29). Perilipin is a target of protein kinase A, and nonphosphorylated perilipin may act as a barrier to the hormone-sensitive lipase (HSL)-mediated lipolysis of triglyceride in lipid droplets (18–24). However, following phosphorylation, perilipin may facilitate HSL action (18,22,30,31). Thus, perilipin A functions to increase cellular triglyceride storage by decreasing the rate of triglyceride hydrolysis and serves an additional role in controlling the release of triglycerides in times of need. Regulation of this process may contribute to obesity and alterations in lipid metabolism.

The aim of this study was to examine the effects of *PLIN* polymorphisms on the weight gain associated with rosiglitazone treatment in type 2 diabetic patients.

## RESEARCH DESIGN AND METHODS

A total of 160 patients with type 2 diabetes were recruited from the outpatient clinics at Severance Hospital Diabetes Center, Youngdong Severance Hospital, and Kwandong University Myoungji Hospital. All patients were treated with rosiglitazone (4 mg/day) during a 12-week treatment course, without changes in their previous medications. Type 2 diabetic patients with an HbA<sub>1c</sub> (A1C) value ranging from 7.0 to 12.0% and a fasting plasma glucose (FPG) level ranging from 7.8 to 14.0 mmol/l (140–252 mg/dl) were enrolled in this study. The inclusion criteria were as follows: 1) age between 35 and 80 years, 2) BMI be-

From the <sup>1</sup>Department of Internal Medicine, Yonsei University College of Medicine, Seoul, Korea; the <sup>2</sup>Institute of Endocrine Research, Yonsei University College of Medicine, Seoul, Korea; the <sup>3</sup>Department of Internal Medicine, Kwandong University College of Medicine, Gangneung, Korea; and the <sup>4</sup>Department of Endocrinology and Metabolism, Ajou University College of Medicine, Suwon, Korea.

Address correspondence and reprint requests to Hyun Chul Lee, MD, PhD, Department of Internal Medicine, Yonsei University College of Medicine, 134 Shinchon-Dong Seodaemun-Gu, Seoul, 120-752, Korea. E-mail: endohclee@yumc.yonsei.ac.kr.

Received for publication 15 December 2005 and accepted in revised form 5 March 2006.

**Abbreviations:** FPG, fasting plasma glucose; HOMA-IR, homeostasis model assessment of insulin resistance; HSL, hormone-sensitive lipase; PPAR, peroxisome proliferator-activated receptor, SNP, single nucleotide polymorphism; TZD, thiazolidinedione.

A table elsewhere in this issue shows conventional and Système International (SI) units and conversion factors for many substances.

DOI: 10.2337/dc05-2466

© 2006 by the American Diabetes Association.

The costs of publication of this article were defrayed in part by the payment of page charges. This article must therefore be hereby marked "advertisement" in accordance with 18 U.S.C. Section 1734 solely to indicate this fact.

Table 1—Primer and probe sequences for the amplification of PLIN SNPs

| SNP                  |            | Primers and probes |                           |
|----------------------|------------|--------------------|---------------------------|
| 11482G/A<br>Intron 6 | rs 894160  | Sense              | AATAGAGTGGCATCCCCAA       |
|                      |            | Antisense          | AAGAAATTGACTGAGCAAGGG     |
|                      |            | Probe              | AAGAAATTGACTGAGCAAGGG     |
| 14995A/T<br>Exon 9   | rs 1052700 | Sense              | TCCTCTGTGATCTAGGATGATCT   |
|                      |            | Antisense          | TCCTCTGTGATCTAGGATGATCT   |
|                      |            | Probe              | CTCTGATGAACATCCTCTGATGATC |
| 6209G/A<br>Intron 2  | rs 2289487 | Sense              | AGAGTCTTGAAGGAATGGCAT     |
|                      |            | Antisense          | AAACATTTTCTGGTCTTTCTGG    |
|                      |            | Probe              | AAGGGCTGTGGGAGGGAAGGTGAGC |
| 13041A>G<br>Exon 8   | rs 2304795 | Sense              | CTGTGCTGGGCATGGCAG        |
|                      |            | Antisense          | CATCTGATAGGGACATGGC       |
|                      |            | Probe              | TGCTGCACCTCACACCAGCCCC    |

tween 18.5 and 30 kg/m<sup>2</sup>, 3) no history of PPAR agonist or statin use, 4) no medication changes in the previous 3 months, and 5) for women, postmenopause or using the appropriate contraceptive methods. Patients with type 1 diabetes; those receiving insulin therapy; those with any history of ketoacidosis, ischemic heart disease, or congestive heart failure (New York Heart Association II-IV); and pregnant or lactating women were excluded from this study.

The patients were educated to eat a stable-calorie diet and were instructed to maintain the same level of physical activity throughout this study. The institutional review board of Yonsei University College of Medicine approved the study protocol. Adequate information about this study was provided to the subjects, and all patients provided informed consent.

Anthropometric measurements were taken using standard techniques. All patients were weighed when they visited the diabetes center at the baseline time point and 3 months after rosiglitazone treatment. All measurements were done on the same equipment and by the same personnel. Venous blood was collected into EDTA-containing glass tubes. Plasma total cholesterol, fasting triglyceride, HDL cholesterol, FPG, and 2-h postprandial plasma glucose levels were measured. The A1C values were determined by high-performance liquid chromatography (Variant II; Greencross, Seoul, Korea). Insulin concentration was measured using a radioimmunoassay kit (Dainabot, Tokyo, Japan). The homeostasis model assessment of insulin resistance (HOMA-IR) was calculated using the following formula to estimate the level of insulin sensitivity: fasting insulin [(μU/ml) × fasting

glucose (mmol/l)]/22.5 (32). A BN II nephelometer analyzer (Dade Behring, Newark, DE) was used to measure serum high-sensitivity C-reactive protein levels using a latex-enhanced, immunonephelometric assay method as previously described (33,34). Serum adiponectin concentrations were measured using a commercial radioimmunoassay kit (Linco Research, St. Charles, MO).

### PLIN genotyping

DNA was extracted from blood as described (35,36). The size of the Perilipin gene is 164.07 kilobases. Several single nucleotide polymorphisms (SNPs) have been reported. Four polymorphisms at the *PLIN* locus were genotyped: *PLIN* 6209T>C (intron 2), *PLIN* 11482G>A (intron 6), *PLIN* 13041A>G (exon 8), and *PLIN* 14995A>T (exon 9). We se-

lected these four SNPs because they were reported to be associated with obesity in previous studies (37,38). We initially screened the *PLIN* SNPs in a Korean population and selected SNPs whose mutation rate was >25%. The genotyping was analyzed by single-base primer extension assays using a SNaPshot assay kit according to manufacturer's recommendations (ABI, Foster City, CA). Briefly, the genomic DNA region containing the SNP was amplified with PCR. Each PCR contained 10.0 ng DNA, 1× PCR buffer, 0.125 units of *AmpliTaq Gold* DNA polymerase (ABI), 3.0 mmol/l MgCl<sub>2</sub>, 0.25 mmol/l of each dNTP, and 0.5 pmol of each primer in a 10-μl reaction volume. Reactions were incubated at 95°C for 10 min, then cycled 30 times at 95°C for 30 s, 60°C for 1 min, and 72°C for 1 min followed by 72°C for 5 min. The primer sequences are shown in Table 1. After amplification, the PCR products were treated with 1 unit each of shrimp alkaline phosphatase (Roche Diagnostics, Indianapolis, IN) and exonuclease I (USB, Cleveland, OH) at 37°C for 60 min and 72°C for 15 min to purify the amplified products. One microliter of the purified amplification products was added to a SNaPshot Multiplex Ready reaction mixture containing 0.15 pmol of genotyping primer. The primer extension reaction was carried out for 25 cycles of 96°C for 10 s, 50°C for 5 s, and 60°C for 30 s. The reaction products were then treated with 1 unit of shrimp alkaline phosphatase at 37°C for 1 h and 72°C for 15 min to remove excess fluorescent dye terminators.

Table 2—Allele and genotype distribution of the PLIN SNPs

| Allele    | <i>n</i> (%) | Genotype | <i>n</i> (%) | <i>P</i> value |
|-----------|--------------|----------|--------------|----------------|
| 6209 G/A  |              |          |              |                |
| G         | 209 (65.3)   | GG       | 65 (40.6)    | 0.26           |
| A         | 111 (34.7)   | GA       | 79 (49.4)    |                |
|           |              | AA       | 16 (10.0)    |                |
| 11482 G/A |              |          |              |                |
| G         | 212 (66.2)   | GG       | 72 (45.0)    | 0.53           |
| A         | 108 (33.8)   | GA       | 68 (42.5)    |                |
|           |              | AA       | 20 (12.5)    |                |
| 13041 A/G |              |          |              |                |
| T         | 235 (73.4)   | TT       | 86 (53.7)    | 0.91           |
| C         | 85 (26.6)    | TC       | 63 (39.4)    |                |
|           |              | CC       | 11 (6.9)     |                |
| 14995 A/T |              |          |              |                |
| A         | 117 (36.6)   | AA       | 22 (13.8)    | 0.84           |
| T         | 203 (63.4)   | AT       | 73 (45.6)    |                |
|           |              | TT       | 65 (40.6)    |                |

P value assessed by Hardy-Weinberg equilibrium  $\chi^2$  test.

Table 3—Patient clinical characteristics before and after rosiglitazone treatment

|                                   | Before        | After         | P value |
|-----------------------------------|---------------|---------------|---------|
| Body weight (kg)                  | 67.17 ± 9.22  | 68.13 ± 8.99  | <0.001  |
| FPG (mmol/l)                      | 9.36 ± 2.61   | 7.88 ± 2.61   | <0.001  |
| 2-h postprandial glucose (mmol/l) | 14.08 ± 4.34  | 11.88 ± 4.07  | <0.001  |
| A1C (%)                           | 8.49 ± 1.37   | 7.77 ± 1.33   | <0.001  |
| Total cholesterol (mmol/l)        | 4.99 ± 0.97   | 5.27 ± 1.05   | <0.001  |
| Triglyceride (mmol/l)             | 2.88 ± 1.85   | 2.85 ± 2.06   | 0.860   |
| HDL cholesterol (mmol/l)          | 1.24 ± 0.36   | 1.22 ± 0.32   | 0.696   |
| LDL cholesterol (mmol/l)          | 2.78 ± 0.79   | 3.07 ± 0.87   | <0.001  |
| Fasting insulin (pmol/l)          | 60.71 ± 37.58 | 53.86 ± 38.18 | 0.038   |
| HOMA-IR                           | 3.15 ± 2.05   | 2.37 ± 1.83   | <0.001  |
| Adiponectin (μg/ml)               | 4.86 ± 4.47   | 9.33 ± 6.90   | <0.001  |

Data are means ± SD. P values before versus after rosiglitazone treatment (paired t test).

One microliter of the final reaction samples containing the extension products was added to 9 μl of Hi-Di formamide (ABI). The mixture was incubated at 95°C for 5 min followed by 5 min on ice and then analyzed by electrophoresis in an ABI Prism 3730 DNA analyzer (ABI). Results were analyzed using Gene Mapper software (ABI).

#### Statistical analysis

Data are shown as means ± SD. All calculations and statistical analyses were performed using the SPSS for Windows software (version 12.0; SPSS, Chicago, IL). Comparisons of the continuous variables between the genotypes were assessed using an ANOVA test. The statistical analysis of triglyceride, HDL cholesterol, fasting insulin, and HOMA-IR levels were performed using log-transformed values because the data were not normally distributed. P values < 0.05 were considered significant. The allelic distribution of each SNP was verified by the Hardy-Weinberg equilibrium.

**RESULTS** — The allele and genotype distribution of the *PLIN* SNPs are shown in Table 2. No significant deviation from Hardy-Weinberg equilibrium was observed for any SNP. The frequencies for the major alleles of the 6209G>A, 11482G>A, 13041A>G, and 14995A>T *PLIN* polymorphisms were 0.653, 0.663, 0.734, and 0.634, respectively.

The clinical characteristics of the patients before and after rosiglitazone treatment are shown in Table 3. The FPG, 2-h postprandial glucose levels, and A1C values decreased significantly after 12 weeks of treatment. Mean body weight was significantly higher after the rosiglitazone treatment (67.17 ± 9.22 vs. 68.13 ± 8.99

kg,  $P < 0.001$ ). The range of mean body weight change was from −4.9 to +6.4 kg. The serum adiponectin concentration was also significantly higher after the rosiglitazone treatment (4.86 ± 4.47 vs. 9.33 ± 6.90 μg/ml,  $P < 0.001$ ). Total cholesterol and LDL cholesterol levels increased significantly with rosiglitazone treatment, whereas there was no significant change in HDL cholesterol or triglyceride levels (Table 3). Insulin resistance was improved as shown by HOMA-IR and insulin level studies (Table 3).

There were no significant differences in terms of age, duration of diabetes, lipid profiles, HOMA-IR, FPG, A1C, insulin,

adiponectin, or high-sensitivity C-reactive protein levels between the SNP 11482 genotypes (Table 4). Initial mean body weight was also not different between the genotypes. However, after 12 weeks of treatment, a significant difference was seen in the amount of weight gain in response to rosiglitazone treatment, and this difference was associated with the *PLIN* 11482G>A polymorphism. There was an additive dose-response relationship between number of A allele and the degree of weight gain (GG, 1.33 ± 1.59 kg; GA, 0.85 ± 1.89 kg; and AA, 0.03 ± 1.46 kg;  $P = 0.010$ ) (Table 4). Multiple regression tests were performed and revealed that age, sex, and baseline weight were not found to be major confounding factors of degree of weight gain (Table 5). No statistically significant interaction terms were found for the other *PLIN* polymorphisms (data not shown).

**CONCLUSIONS** — TZDs reduce blood glucose levels and the degree of insulin resistance but promote body weight gain (4–8) and adipogenesis (9–11). These are among the major side effects of TZD treatment. The weight gain associated with the use of TZDs is likely to be due to an increase in subcutaneous adipose tissue. Fluid retention is thought to

Table 4—Clinical and biochemical characteristics of the subjects by *PLIN* 11482 genotype

|                                   | <i>PLIN</i> 11482 genotype |               |               | P value |
|-----------------------------------|----------------------------|---------------|---------------|---------|
|                                   | GG                         | GA            | AA            |         |
| n (men/women)                     | 72 (41/31)                 | 68 (31/37)    | 20 (12/8)     | 0.313*  |
| Age (years)                       | 57.1 ± 9.3                 | 55.5 ± 10.6   | 55.9 ± 9.8    | 0.641   |
| Duration of diabetes (years)      | 6.7 ± 4.8                  | 8.2 ± 6.8     | 5.5 ± 3.8     | 0.288   |
| Weight (kg)                       |                            |               |               |         |
| Before treatment                  | 67.0 ± 9.7                 | 66.1 ± 8.9    | 71.2 ± 7.9    | 0.095   |
| After treatment                   | 68.4 ± 9.4                 | 67.0 ± 8.8    | 71.2 ± 7.7    | 0.172   |
| ΔWeight                           | 1.33 ± 1.59                | 0.85 ± 1.89   | 0.03 ± 1.46   | 0.010   |
| FPG (mmol/l)                      | 9.34 ± 2.59                | 9.62 ± 2.51   | 8.91 ± 3.13   | 0.541   |
| 2-h postprandial glucose (mmol/l) | 13.23 ± 4.29               | 14.28 ± 4.51  | 12.15 ± 4.64  | 0.156   |
| A1C (%)                           | 8.41 ± 1.39                | 8.64 ± 1.35   | 8.38 ± 1.28   | 0.549   |
| Total cholesterol (mmol/l)        | 4.95 ± 0.84                | 5.05 ± 1.09   | 4.87 ± 1.03   | 0.745   |
| Triglyceride (mmol/l)             | 3.03 ± 1.93                | 2.97 ± 2.05   | 2.51 ± 0.95   | 0.621   |
| HDL cholesterol (mmol/l)          | 1.24 ± 0.32                | 1.20 ± 0.25   | 1.35 ± 0.70   | 0.367   |
| LDL cholesterol (mmol/l)          | 2.73 ± 0.78                | 2.79 ± 0.73   | 2.73 ± 1.13   | 0.923   |
| Insulin (pmol/l)                  | 56.23 ± 30.21              | 37.32 ± 42.92 | 57.37 ± 42.20 | 0.247   |
| Adiponectin (μg/ml)               | 4.75 ± 3.32                | 4.98 ± 5.74   | 4.86 ± 3.03   | 0.955   |
| hsCRP (mg/l)                      | 1.75 ± 2.69                | 1.65 ± 2.71   | 1.16 ± 1.18   | 0.588   |
| HOMA-IR                           | 2.91 ± 1.79                | 3.49 ± 2.36   | 3.17 ± 1.88   | 0.306   |

Data are means ± SD. P values reflect differences between the three groups and were assessed by ANOVA. \*P value assessed by  $\chi^2$  test. hsCRP, high-sensitivity C-reactive protein.



**Table 5—Multivariate regression analysis for influence of clinical and genetic factors on the amount of weight gain with rosiglitazone treatment**

| Variable                                   | Odds ratio | P value | 95% CI           |
|--------------------------------------------|------------|---------|------------------|
| Sex (0 = men, 1 = women)                   | 0.045      | 0.622   | −0.473 to 0.789  |
| Age                                        | 0.008      | 0.917   | −0.026 to 0.028  |
| Baseline body weight                       | −0.174     | 0.061   | −0.068 to 0.001  |
| 11482 genotype (0 = GG,<br>1 = GA, 2 = AA) | −0.220     | 0.005   | −0.947 to −0.171 |

be another potential cause of increased body weight.

In previous studies (35,36), we have shown that genetic variations in the adiponectin and PPAR $\gamma$ 2 genes can affect the response to rosiglitazone treatment in patients with type 2 diabetes. In this study, we examined the relationship between weight gain, a major side effect of rosiglitazone treatment, and genetic polymorphisms in the perilipin gene in 160 patients with type 2 diabetic. In this study, mean body weight increased about 1 kg and HOMA-IR decreased after 3 months of treatment with rosiglitazone. However, the value of HOMA-IR in measuring insulin resistance in patients with a lower BMI, insulin secretory defect, and high fasting plasma glucose levels is limited (32).

Recent studies have revealed that perilipin null mice have markedly reduced adipose tissue mass and high levels of lipolysis (19,20). When fed a high fat diet, perilipin null mice are resistant to diet-induced obesity. PPAR $\gamma$  agonists are reported to stimulate perilipin gene expression in adipocytes (39). Reporter assays reveal that the 5'-flanking region of the gene contains a functional PPAR $\gamma$ -responsive element (40). These findings suggest that there could be a difference in the amount of weight gained during treatment with PPAR $\gamma$  agonists, depending on perilipin gene polymorphisms. Therefore, we have conducted a prospective pharmacogenetic study on rosiglitazone and one of its side effects, weight gain. Our results show that patients who are homozygous for the 11482A allele are more resistant to weight gain in response to rosiglitazone treatment than those who are 11482G homozygotes. This effect may be due to differences in the level of perilipin in the adipocyte tissue. This hypothesis is supported by the study of Mottagui-Tabar et al. (23) who reported that subjects with the *PLIN* 11482AA genotype had an 80% reduction in adipocyte perilipin content compared with

11482G homozygotes. Adipocyte tissue in AA individuals may have relatively decreased perilipin protein levels in response to PPAR $\gamma$  stimulation. Thus, triglycerides would be more easily hydrolyzed by HSL, and the half-life of stored triglyceride would be shortened. These factors could contribute to the lower increase in body weight seen in AA homozygotes in response to PPAR $\gamma$  agonists. Because *PLIN* SNP 11482 is located in intron 6, there is a possibility that this SNP might be simply tagging another SNP that is potentially functional, or mRNA splicing/stability could play a role in the protein amount variation. Further investigations will be needed to elucidate the functional mechanism of these polymorphisms.

Recently, Corella et al. (37) reported that *PLIN* 11482A carriers were resistant to weight loss from low-energy diets. Conversely, this study suggests that patients who are AA homozygotes at the *PLIN* 11482 locus are more likely to be protected from weight gain due to PPAR $\gamma$  agonist treatment. Qi et al. (38) reported that the 11482A variant was associated with a lower risk of obesity (0.56 [95% CI 0.36–0.89]) in Caucasian women. However, we did not find any difference in mean body weight according to this genotype. Also, we did not observe sex-specific associations. In addition to the differences in ethnicity existing between the two studies, only 4.3% of subjects in their study group had diabetes, whereas all of our study subjects had diabetes. These factors could contribute to the different study outcomes.

In summary, our results suggest that genetic variations in the perilipin gene can affect the weight gain associated with rosiglitazone treatment in type 2 diabetic patients. These findings are potentially clinically relevant for predicting which patients will be likely to gain more weight when treated with rosiglitazone. The exact molecular mechanism for this interaction remains to be elucidated and will be the subject of further studies.

**Acknowledgments**—This study was supported by the Brain Korea 21 Project for Medical Science, Yonsei University; by a grant from the Korea Health 21 R&D Project, Ministry of Health and Welfare, Republic of Korea (03-PJ10-PG13-GD01-0002); and by a grant from the Korean Society of Endocrinology (2006).

## References

- Debril MB, Renaud JP, Fajas L, Auwerx J: The pleiotropic functions of peroxisome proliferator-activated receptor  $\gamma$ . *J Mol Med* 79:30–47, 2001
- Diamant M, Heine RJ: Thiazolidinediones in type 2 diabetes mellitus: current clinical evidence. *Drugs* 63:1373–1405, 2003
- Kersten S, Desvergne B, Wahli W: Roles of PPARs in health and disease. *Nature* 405: 421–424, 2000
- Hallakou S, Doare L, Fougelle F, Kergoat M, Guerre-Millo M, Berthault MF, Dugail I, Morin J, Auwerx J, Ferre P: Pioglitazone induces in vivo adipocyte differentiation in the obese Zucker fa/fa rat. *Diabetes* 46: 1393–1399, 1997
- Chaput ESR, Silvestre M, Edgar AD: Fenofibrate and rosiglitazone lower serum triglycerides with opposing effects on body weight. *Biochem Biophys Res Commun* 271:445–450, 2000
- Kelly IE, Han TS, Walsh K, Lean ME: Effects of a thiazolidinedione compound on body fat and fat distribution of patients with type 2 diabetes. *Diabetes Care* 22: 288–293, 1999
- Miyazaki Y, Glass L, Triplitt C, Matsuda M, Cusi K, Mahankali A, Mahankali S, Mandarino LJ, DeFronzo RA: Effect of rosiglitazone on glucose and non-esterified fatty acid metabolism in type II diabetic patients. *Diabetologia* 44:2210–2219, 2001
- Schwartz S, Raskin P, Fonseca V, Graveline JF: Effect of troglitazone in insulin-treated patients with type II diabetes mellitus: Troglitazone and Exogenous Insulin Study Group. *N Engl J Med* 338:861–866, 1998
- Kletzien RF, Clarke SD, Ulrich RG: Enhancement of adipocyte differentiation by an insulin-sensitizing agent. *Mol Pharmacol* 41:393–398, 1992
- Tontonoz P, Hu E, Graves RA, Budavari AI, Spiegelman BM: mPPAR $\gamma$  2: tissue-specific regulator of an adipocyte enhancer. *Genes Dev* 8:1224–1234, 1994
- Tontonoz P, Hu E, Spiegelman BM: Stimulation of adipogenesis in fibroblasts by PPAR $\gamma$ 2, a lipid-activated transcription factor. *Cell* 79:1147–1156, 1994
- Takeda: Actos prescribing information, 2003
- GlaxoSmithKline: Avandia prescribing information, 2003
- Nakamura T, Funahashi T, Yamashita S, Nishida M, Nishida Y, Takahashi M,

- Hotta K, Kuriyama H, Kihara S, Ohuchi N, Nishimura T, Kishino BI, Ishikawa K, Kawamoto T, Tokunaga K, Nakagawa C, Mineo I, Watanabe F, Tarui S, Matsuzawa Y: Thiazolidinedione derivative improves fat distribution and multiple risk factors in subjects with visceral fat accumulation—double-blind placebo-controlled trial. *Diabetes Res Clin Pract* 54:181–190, 2001
15. Greenberg AS, Egan JJ, Wek SA, Garty NB, Blanchette-Mackie EJ, Londos C: Perilipin, a major hormonally regulated adipocyte-specific phosphoprotein associated with the periphery of lipid storage droplets. *J Biol Chem* 266:11341–11346, 1991
16. Londos C, Brasaemle DL, Gruia-Gray J, Servetnick DA, Schultz CJ, Levin DM, Kimmel AR: Perilipin: unique proteins associated with intracellular neutral lipid droplets in adipocytes and steroidogenic cells. *Biochem Soc Trans* 23:611–615, 1995
17. Greenberg AS, Egan JJ, Wek SA, Moos MC Jr, Londos C, Kimmel AR: Isolation of cDNAs for perilipins A and B: sequence and expression of lipid droplet-associated proteins of adipocytes. *Proc Natl Acad Sci USA* 90:12035–12039, 1993
18. Tansey JT, Huml AM, Vogt R, Davis KE, Jones JM, Fraser KA, Brasaemle DL, Kimmel AR, Londos C: Functional studies on native and mutated forms of perilipins: a role in protein kinase A-mediated lipolysis of triacylglycerols. *J Biol Chem* 278:8401–8406, 2003
19. Tansey JT, Sztalryd C, Gruia-Gray J, Roush DL, Zee JV, Gavrilova O, Reitman ML, Deng CX, Li C, Kimmel AR, Londos C: Perilipin ablation results in a lean mouse with aberrant adipocyte lipolysis, enhanced leptin production, and resistance to diet-induced obesity. *Proc Natl Acad Sci USA* 98:6494–6499, 2001
20. Martinez-Botas J, Anderson JB, Tessier D, Lapillonne A, Chang BH, Quast MJ, Gorenstein D, Chen KH, Chan L: Absence of perilipin results in leanness and reverses obesity in *Lepr(db/db)* mice. *Nat Genet* 26:474–479, 2000
21. Brasaemle DL, Rubin B, Harten IA, Gruia-Gray J, Kimmel AR, Londos C: Perilipin A increases triacylglycerol storage by decreasing the rate of triacylglycerol hydrolysis. *J Biol Chem* 275:38486–38493, 2000
22. Souza SC, de Vargas LM, Yamamoto MT, Lien P, Franciosa MD, Moss LG, Greenberg AS: Overexpression of perilipin A and B blocks the ability of tumor necrosis factor  $\alpha$  to increase lipolysis in 3T3-L1 adipocytes. *J Biol Chem* 273:24665–24669, 1998
23. Mottagui-Tabar S, Ryden M, Lofgren P, Faulds G, Hoffstedt J, Brookes AJ, Andersson I, Arner P: Evidence for an important role of perilipin in the regulation of human adipocyte lipolysis. *Diabetologia* 46:789–797, 2003
24. Souza SC, Muliro KV, Liscum L, Lien P, Yamamoto MT, Schaffer JE, Dallal GE, Wang X, Kraemer FB, Obin M, Greenberg AS: Modulation of hormone-sensitive lipase and protein kinase A-mediated lipolysis by perilipin A in an adenoviral reconstituted system. *J Biol Chem* 277:8267–8272, 2002
25. Nishiu J, Tanaka T, Nakamura Y: Isolation and chromosomal mapping of the human homolog of perilipin (PLIN), a rat adipose tissue-specific gene, by differential display method. *Genomics* 48:254–257, 1998
26. Mori Y, Otabe S, Dina C, Yasuda K, Populaire C, Lecoeur C, Vatin V, Durand E, Hara K, Okada T, Tobe K, Boutin P, Kadowaki T, Froguel P: Genome-wide search for type 2 diabetes in Japanese affected sib-pairs confirms susceptibility genes on 3q, 15q, and 20q and identifies two new candidate loci on 7p and 11p. *Diabetes* 51:1247–1255, 2002
27. Duggirala R, Blangero J, Almasy L, Dyer TD, Williams KL, Leach RJ, O'Connell P, Stern MP: A major susceptibility locus influencing plasma triglyceride concentrations is located on chromosome 15q in Mexican Americans. *Am J Hum Genet* 66:1237–1245, 2000
28. Lu X, Gruia-Gray J, Copeland NG, Gilbert DJ, Jenkins NA, Londos C, Kimmel AR: The murine perilipin gene: the lipid droplet-associated perilipins derive from tissue-specific, mRNA splice variants and define a gene family of ancient origin. *Mamm Genome* 12:741–749, 2001
29. Wang Y, Sullivan S, Trujillo M, Lee MJ, Schneider SH, Brodin RE, Kang YH, Werber Y, Greenberg AS, Fried SK: Perilipin expression in human adipose tissues: effects of severe obesity, gender, and depot. *Obes Res* 11:930–936, 2003
30. Sztalryd C, Xu G, Dorward H, Tansey JT, Contreras JA, Kimmel AR, Londos C: Perilipin A is essential for the translocation of hormone-sensitive lipase during lipolytic activation. *J Cell Biol* 161:1093–1103, 2003
31. Zhang HH, Souza SC, Muliro KV, Kraemer FB, Obin MS, Greenberg AS: Lipase-selective functional domains of perilipin A differentially regulate constitutive and protein kinase A-stimulated lipolysis. *J Biol Chem* 278:51535–51542, 2003
32. Kang ES, Yun YS, Park SW, Kim HJ, Ahn CW, Song YD, Cha BS, Lim SK, Kim KR, Lee HC: Limitation of the validity of the homeostasis model assessment as an index of insulin resistance in Korea. *Metabolism* 54:206–211, 2005
33. Kang ES, Kim HJ, Ahn CW, Park CW, Cha BS, Lim SK, Kim KR, Lee HC: Relationship of serum high sensitivity C-reactive protein to metabolic syndrome and microvascular complications in type 2 diabetes. *Diabetes Res Clin Pract* 69:151–159, 2005
34. Kang ES, Kim HJ, Kim YM, Lee S, Cha BS, Lim SK, Kim HJ, Lee HC: Serum high sensitivity C-reactive protein is associated with carotid intima-media thickness in type 2 diabetes. *Diabetes Res Clin Pract* 66 (Suppl. 1):S115–S120, 2004
35. Kang ES, Park SY, Kim HJ, Kim CS, Ahn CW, Cha BS, Lim SK, Nam CM, Lee HC: Effects of Pro12Ala polymorphism of peroxisome proliferator-activated receptor  $\gamma$ 2 gene on rosiglitazone response in type 2 diabetes. *Clin Pharmacol Ther* 78:202–208, 2005
36. Kang ES, Park SY, Kim HJ, Ahn CW, Nam M, Cha BS, Lim SK, Kim KR, Lee HC: The influence of adiponectin gene polymorphism on the rosiglitazone response in patients with type 2 diabetes. *Diabetes Care* 28:1139–1144, 2005
37. Corella D, Qi L, Sorli JV, Godoy D, Portoles O, Coltell O, Greenberg AS, Ordovas JM: Obese subjects carrying the 11482G>A polymorphism at the perilipin locus are resistant to weight loss after dietary energy restriction. *J Clin Endocrinol Metab* 90:5121–5126, 2005
38. Qi L, Corella D, Sorli JV, Portoles O, Shen H, Coltell O, Godoy D, Greenberg AS, Ordovas JM: Genetic variation at the perilipin (PLIN) locus is associated with obesity-related phenotypes in white women. *Clin Genet* 66:299–310, 2004
39. Arimura N, Horiba T, Imagawa M, Shimizu M, Sato R: The peroxisome proliferator-activated receptor  $\gamma$  regulates expression of the perilipin gene in adipocytes. *J Biol Chem* 279:10070–10076, 2004
40. Nagai S, Shimizu C, Umetsu M, Taniguchi S, Endo M, Miyoshi H, Yoshioka N, Kubo M, Koike T: Identification of a functional peroxisome proliferator-activated receptor responsive element within the murine perilipin gene. *Endocrinology* 145:2346–2356, 2004
